# Supplementary material for: Methicillin-Resistant Staphylococcus aureus (MRSA) in Poultry Species in Algeria: Long-Term Study on Prevalence and Antimicrobial Resistance
Source: MDPI journal article supplement (doi:10.3390/vetsci7020054), 2020-04-27
Supplement: s1 [file vetsci-759620-supplementary.xlsx]

## Sheet: Supp. Table 1
	Supplementary Table 1: Metadata and antimicrobial profiles of MRSA isolates collecetd from poultry in Algeria to a panel of 16 antibiotics (R: Resistant, S: Succeptable).
			Strain information					Penicilline G	Amoxicillin/clavulinic acid	Oxacilline	Cefoxitin	Gentamicin	Tetracycline	Vancomycine	Ciprofloxacine	Streptomycin	Trimethoprim/Sulfamethoxazole	Kanamycine	Chloranphenicol	Erythroycine	Mupirocin	Clindamycine	Rifamycin
	No.	ID	Poultry species	Age	Date of islation	Region	Wilaya	PEN	AMC	OXA	FOX	GEN	TCY	VAN	ECP	STR	SXT	KAN.	CAM	ERY	MUP	CLN	RIF
	1	MRSA 01	Turkey	26 WEEKS	2011	BOUMERDES	BOUMERDES	R	R	R	R	S	R	S	R	S	R	S	S	S	S	R	S
	2	MRSA 02	Turkey	17 WEEKS	2011	BOUMERDES	BOUMERDES	R	R	R	R	R	S	S	R	R	R	R	R	R	S	S	S
	3	MRSA 03	Turkey	28 WEEKS	2011	BOUMERDES	BOUMERDES	R	R	R	R	S	R	S	S	S	S	S	S	R	S	R	S
	4	MRSA 04	Turkey	09 WEEKS	2011	ALGER	ALGER	R	R	R	R	S	R	S	R	S	R	R	S	S	S	R	S
	5	MRSA 05	Turkey	11 WEEKS	2011	BBA	BBA	R	R	R	R	S	S	S	S	S	S	S	S	R	S	S	S
	6	MRSA 06	Turkey	31 WEEKS	2011	AIN BESSAM	BOUIRA	R	R	R	R	S	R	S	S	R	S	R	S	R	S	R	S
	7	MRSA 07	Turkey	10 WEEKS	2011	SAIDA	SAIDA	R	R	R	R	S	R	S	S	S	S	S	S	S	S	R	S
	8	MRSA 08	Turkey	33 WEEKS	2011	ANNABA	ANNABA	R	R	R	R	S	R	S	S	S	S	S	S	S	S	R	S
	9	MRSA 09	Turkey	07 DAYS	2012	DELLYS	BOUMERDES	R	R	R	R	S	R	S	R	S	S	S	S	R	S	R	S
	10	MRSA 10	Turkey	10 DAYS	2012	BOUMERDES	BOUMERDES	R	R	R	R	R	R	S	S	S	S	S	S	S	S	R	S
	11	MRSA 11	Turkey	12 WEEKS	2012	BOUDOUAOU	BOUMERDES	R	R	R	R	S	R	S	R	S	S	S	S	R	S	S	S
	12	MRSA 12	Turkey	20 WEEKS	2012	ANNABA	ANNABA	R	R	R	R	S	R	S	S	S	S	R	S	R	S	R	S
	13	MRSA 13	Turkey	24 WEEKS	2012	BBA	BBA	R	R	R	R	R	S	S	R	R	R	R	R	R	S	S	S
	14	MRSA 14	Turkey	07 DAYS	2012	BLIDA	BLIDA	R	R	R	R	S	R	S	S	S	S	S	S	R	S	R	S
	15	MRSA 15	Turkey	12 WEEKS	2012	SETIF	SETIF	R	R	R	R	S	R	S	R	S	R	R	S	S	S	R	S
	16	MRSA 16	Turkey	25 WEEKS	2012	DJELFA	DJELFA	R	R	R	R	S	S	S	S	S	S	S	S	R	S	S	S
	17	MRSA 17	Turkey	26 WEEKS	2012	SAIDA	SAIDA	R	R	R	R	S	R	S	S	R	S	R	R	R	S	R	S
	18	MRSA 18	Turkey	30 WEEKS	2013	TIPAZA	TIPAZA	R	R	R	R	S	R	S	S	S	S	S	S	S	S	R	S
	19	MRSA 19	Turkey	16 WEEKS	2013	DJELFA	DJELFA	R	R	R	R	S	R	S	S	S	S	S	S	S	S	R	S
	20	MRSA 20	Turkey	15 DAYS	2013	BOUMERDES	BOUMERDES	R	R	R	R	S	R	S	R	S	S	S	S	R	S	R	S
	21	MRSA 21	Turkey	16 DAYS	2013	BOUMERDES	BOUMERDES	R	R	R	R	R	R	S	S	S	R	R	S	R	S	R	S
	22	MRSA 22	Turkey	26 WEEKS	2013	BATNA	BATNA	R	R	R	R	S	R	S	S	S	S	S	S	R	S	S	S
	23	MRSA 23	Turkey	22 WEEKS	2013	BATNA	BATNA	R	R	R	R	S	R	S	S	S	S	R	S	R	S	R	S
	24	MRSA 24	Turkey	21 WEEKS	2013	BBA	BBA	R	R	R	R	S	R	S	R	S	S	S	S	R	S	R	S
	25	MRSA 25	Turkey	10 WEEKS	2013	ANNABA	ANNABA	R	R	R	R	S	R	S	R	S	R	S	S	S	S	R	S
	26	MRSA 26	Turkey	23 WEEKS	2013	ANNABA	ANNABA	R	R	R	R	S	R	S	S	S	S	S	R	R	S	R	S
	27	MRSA 27	Turkey	4 WEEKS	2013	ALGER	ALGER	R	R	R	R	R	R	S	R	S	S	R	S	R	S	S	S
	28	MRSA 28	Turkey	20 WEEKS	2013	ALGER	ALGER	R	R	R	R	S	R	S	S	S	S	S	S	R	S	R	S
	29	MRSA 29	Turkey	26 WEEKS	2013	AIN DEFLA	AIN DEFLA	R	R	R	R	S	S	S	R	S	S	R	S	R	S	S	S
	30	MRSA 30	Turkey	17 WEEKS	2013	AIN DEFLA	AIN DEFLA	R	R	R	R	S	R	S	S	S	S	S	S	S	S	R	S
	31	MRSA 31	Turkey	28 WEEKS	2014	BOUMERDES	BOUMERDES	R	R	R	R	S	R	S	R	R	S	S	S	R	S	S	S
	32	MRSA 32	Turkey	9WEEKS	2014	BOUMERDES	BOUMERDES	R	R	R	R	R	R	S	R	S	S	R	S	R	S	R	S
	33	MRSA 33	Turkey	11 WEEKS	2014	BOUIRA	BOUIRA	R	R	R	R	S	R	S	S	R	S	S	R	R	S	R	S
	34	MRSA 34	Turkey	31 WEEKS	2014	BBA	BBA	R	R	R	R	S	R	S	R	R	R	S	R	S	S	S	S
	35	MRSA 35	Turkey	10 WEEKS	2014	BBA	BBA	R	R	R	R	S	R	S	S	S	S	S	S	R	S	R	S
	36	MRSA 36	Turkey	33 WEEKS	2014	BBA	BBA	R	R	R	R	R	R	S	R	S	S	R	S	R	S	R	S
	37	MRSA 37	Turkey	07 DAYS	2014	BATNA	BATNA	R	R	R	R	S	R	S	S	S	S	R	S	S	S	R	S
	38	MRSA 38	Turkey	10 DAYS	2014	ALGER	ALGER	R	R	R	R	S	R	S	R	S	R	S	S	R	S	R	S
	39	MRSA 39	Turkey	12 WEEKS	2014	ALGER	ALGER	R	R	R	R	R	S	S	S	R	S	R	S	R	S	S	S
	40	MRSA 40	Turkey	20 WEEKS	2014	ALGER	ALGER	R	R	R	R	S	R	S	S	R	S	S	R	R	S	R	S
	41	MRSA 41	Turkey	24 WEEKS	2014	ALGER	ALGER	R	R	R	R	S	R	S	R	R	S	S	S	R	S	R	S
	42	MRSA 42	Turkey	07 DAYS	2014	ALGER	ALGER	R	R	R	R	S	R	S	S	S	R	R	S	R	S	R	S
	43	MRSA 43	Turkey	12 WEEKS	2015	TIZI OUAZOU	TIZI OUAZOU	R	R	R	R	S	R	S	R	S	S	S	S	R	S	S	S
	44	MRSA 44	Turkey	25 WEEKS	2015	TIZI OUAZOU	TIZI OUAZOU	R	R	R	R	R	R	S	R	S	S	R	S	S	S	R	S
	45	MRSA 45	Turkey	26 WEEKS	2015	TIZI OUAZOU	TIZI OUAZOU	R	R	R	R	S	S	S	S	S	R	S	S	S	S	S	S
	46	MRSA 46	Turkey	30 WEEKS	2015	SAIDA	SAIDA	R	R	R	R	S	R	S	R	R	R	R	R	R	R	R	R
	47	MRSA 47	Turkey	16 WEEKS	2015	SAIDA	SAIDA	R	R	R	R	S	R	S	R	R	S	S	S	R	S	S	S
	48	MRSA 48	Turkey	15 DAYS	2015	TIARET	TIARET	R	R	R	R	R	R	S	R	S	S	R	S	R	S	R	S
	49	MRSA 49	Turkey	16 DAYS	2015	TIARET	TIARET	R	R	R	R	S	R	S	S	R	S	S	R	R	S	R	S
	50	MRSA 50	Turkey	17 WEEKS	2015	BBA	BBA	R	R	R	R	S	R	S	R	R	R	S	R	S	S	S	S
	51	MRSA 51	Turkey	28 WEEKS	2015	BBA	BBA	R	R	R	R	S	R	S	S	S	S	S	S	R	S	R	S
	52	MRSA 52	Turkey	9WEEKS	2015	BBA	BBA	R	R	R	R	R	R	S	R	S	S	R	S	S	S	R	S
	53	MRSA 53	Turkey	11 WEEKS	2015	ALGER	ALGER	R	R	R	R	S	R	S	S	S	S	R	S	S	S	R	S
	54	MRSA 54	Turkey	31 WEEKS	2015	ALGER	ALGER	R	R	R	R	S	R	S	R	S	R	S	S	R	S	R	S
	55	MRSA 55	Turkey	10 WEEKS	2015	ALGER	ALGER	R	R	R	R	R	S	S	R	R	S	R	S	R	S	S	S
	56	MRSA 56	Turkey	33 WEEKS	2015	ALGER	ALGER	R	R	R	R	S	R	S	S	R	S	S	R	R	S	R	S
	57	MRSA 57	Turkey	07 DAYS	2015	BOUMERDES	BOUMERDES	R	R	R	R	S	R	S	R	R	S	S	S	R	S	R	S
	58	MRSA 58	Turkey	10 DAYS	2015	DELLYS	BOUMERDES	R	R	R	R	S	R	S	S	S	R	R	S	R	S	R	S
	59	MRSA 59	Turkey	12 WEEKS	2016	SAIDA	SAIDA	R	R	R	R	S	R	S	R	S	S	S	S	R	S	S	S
	60	MRSA 60	Turkey	20 WEEKS	2016	BOUMERDES	BOUMERDES	R	R	R	R	R	R	S	S	S	S	R	S	S	S	R	S
	61	MRSA 61	Turkey	24 WEEKS	2016	BOUIRA	BOUIRA	R	R	R	R	R	R	S	S	S	S	R	S	S	S	R	S
	62	MRSA 62	Turkey	07 DAYS	2016	BBA	BBA	R	R	R	R	S	R	S	R	S	S	S	R	R	S	R	S
	63	MRSA 63	Turkey	12 WEEKS	2016	BBA	BBA	R	R	R	R	R	R	S	R	S	S	R	S	R	S	S	S
	64	MRSA 64	Turkey	25 WEEKS	2016	BATNA	BATNA	R	R	R	R	S	R	S	S	S	S	S	S	R	S	R	S
	65	MRSA 65	Turkey	26 WEEKS	2016	ANNABA	ANNABA	R	R	R	R	S	S	S	R	S	S	R	S	R	S	S	S
	66	MRSA 66	Turkey	30 WEEKS	2016	ALGER	ALGER	R	R	R	R	S	R	S	S	S	S	S	S	R	S	R	S
	67	MRSA 67	Turkey	16 WEEKS	2016	ALGER	ALGER	R	R	R	R	S	S	S	R	S	S	R	S	S	S	R	S
	68	MRSA 68	Turkey	07 DAYS	2016	ALGER	ALGER	R	R	R	R	S	R	S	R	S	R	S	S	S	S	R	S
	69	MRSA 69	Turkey	10 DAYS	2016	ALGER	ALGER	R	R	R	R	R	S	S	R	R	R	R	R	R	S	S	S
	70	MRSA 70	Turkey	12 WEEKS	2016	ALGER	ALGER	R	R	R	R	S	R	S	S	S	S	S	S	R	S	R	S
	71	MRSA 71	Turkey	20 WEEKS	2017	TIZI OUAZOU	TIZI OUAZOU	R	R	R	R	S	R	S	R	S	R	R	S	S	S	R	S
	72	MRSA 72	Turkey	24 WEEKS	2017	OUSSARA	DJELFA	R	R	R	R	S	S	S	R	S	S	S	S	R	S	S	S
	73	MRSA 73	Turkey	07 DAYS	2017	DJELFA	DJELFA	R	R	R	R	S	R	S	R	R	S	R	R	R	S	R	S
	74	MRSA 74	Turkey	12 WEEKS	2017	DJELFA	DJELFA	R	R	R	R	S	R	S	S	S	S	S	S	S	S	R	S
	75	MRSA 75	Turkey	25 WEEKS	2017	BOUMERDES	BOUMERDES	R	R	R	R	S	R	S	R	R	R	R	R	R	R	R	R
	76	MRSA 76	Turkey	26 WEEKS	2017	BBA	BBA	R	R	R	R	S	R	S	R	S	S	S	S	R	S	R	S
	77	MRSA 77	Turkey	30 WEEKS	2018	BBA	BBA	R	R	R	R	R	R	S	S	R	R	R	S	R	S	R	S
	78	MRSA 78	Turkey	16 WEEKS	2018	BATNA	BATNA	R	R	R	R	R	R	S	R	S	S	S	S	R	S	S	S
	79	MRSA 79	Turkey	10 DAYS	2018	BOUIRA	ALGER	R	R	R	R	R	R	S	S	S	R	R	S	R	S	R	S
	80	MRSA 80	Turkey	12 WEEKS	2018	BOUIRA	ALGER	R	R	R	R	R	R	S	S	S	S	S	S	R	S	R	S
	81	MRSA 81	Turkey	20 WEEKS	2018	ROUIBA	ROUIBA	R	R	R	R	R	S	S	R	S	R	S	S	S	S	R	S
	82	MRSA 82	Turkey	24 WEEKS	2018	ROUIBA	ROUIBA	R	R	R	R	R	S	S	R	R	R	R	S	R	S	R	S
	83	MRSA 83	Turkey	07 DAYS	2018	ROUIBA	ROUIBA	R	R	R	R	R	R	S	R	S	S	R	S	R	S	R	S
	84	MRSA 84	Breedin hens	07 DAYS	2011	DELLYS	BOUMERDES	R	R	R	R	S	S	S	R	S	S	R	S	S	S	R	S
	85	MRSA 85	Breedin hens	10 DAYS	2011	OUASSARA	DJELFA	R	R	R	R	S	R	S	R	S	R	S	S	S	S	R	S
	86	MRSA 86	Breedin hens	12 WEEKS	2011	ROUIBA	ALGER	R	R	R	R	R	S	S	R	R	R	R	R	R	S	S	S
	87	MRSA 87	Breedin hens	20 WEEKS	2011	SAIDA	SAIDA	R	R	R	R	S	R	S	S	S	S	S	S	R	S	R	S
	88	MRSA 88	Breedin hens	24 WEEKS	2012	CHLEF	CHLEF	R	R	R	R	S	R	S	R	S	R	R	S	S	S	R	S
	89	MRSA 89	Breedin hens	07 DAYS	2012	DELLYS	BOUMERDES	R	R	R	R	S	S	S	S	S	S	S	S	R	S	S	S
	90	MRSA 90	Breedin hens	12 WEEKS	2012	BOUDOUAOU	BOUMERDES	R	R	R	R	S	R	S	S	R	S	R	R	R	S	R	S
	91	MRSA 91	Breedin hens	25 WEEKS	2012	ROUIBA	ALGER	R	R	R	R	S	R	S	S	S	S	S	S	S	S	R	S
	92	MRSA 92	Breedin hens	26 WEEKS	2012	TIZI OUAZOU	TIZI OUAZOU	R	R	R	R	S	R	S	S	S	S	S	S	S	S	R	S
	93	MRSA 93	Breedin hens	30 WEEKS	2013	TIZI OUAZOU	TIZI OUAZOU	R	R	R	R	S	R	S	R	S	S	S	S	R	S	R	S
	94	MRSA 94	Breedin hens	16 WEEKS	2013	BOUIRA	BOUIRA	R	R	R	R	R	R	S	S	S	R	R	S	R	S	R	S
	95	MRSA 95	Breedin hens	15 DAYS	2014	BOUMERDES	BOUMERDES	R	R	R	R	S	R	S	S	S	S	S	S	R	S	S	S
	96	MRSA 96	Breedin hens	16 DAYS	2014	BOUMERDES	BOUMERDES	R	R	R	R	S	R	S	S	S	S	R	S	R	S	R	S
	97	MRSA 97	Breedin hens	26 WEEKS	2014	BOUIRA	BOUIRA	R	R	R	R	S	R	S	S	S	S	S	S	R	S	R	S
	98	MRSA 98	Breedin hens	18 WEEKS	2014	BOUIRA	BOUIRA	R	R	R	R	S	R	S	R	S	R	S	S	S	S	R	S
	99	MRSA 99	Breedin hens	19 WEEKS	2014	ANNABA	ANNABA	R	R	R	R	S	R	S	S	S	S	S	R	R	S	R	S
	100	MRSA 100	Breedin hens	29 WEEKS	2015	TIPAZA	TIPAZA	R	R	R	R	R	R	S	R	S	S	R	S	R	S	S	S
	101	MRSA 101	Breedin hens	15 DAYS	2016	SAIDA	SAIDA	R	R	R	R	S	R	S	S	S	S	S	S	R	S	R	S
	102	MRSA 102	Breedin hens	25 DAYS	2016	SAIDA	SAIDA	R	R	R	R	S	S	S	R	S	S	R	S	R	S	S	S
	103	MRSA 103	Breedin hens	36 DAYS	2016	SAIDA	SAIDA	R	R	R	R	S	R	S	R	S	S	S	S	S	S	R	S
	104	MRSA 104	Breedin hens	17 WEEKS	2016	BOUIRA	BOUIRA	R	R	R	R	S	R	S	S	R	S	S	S	R	S	S	S
	105	MRSA 105	Breedin hens	19 WEEKS	2016	ANNABA	ANNABA	R	R	R	R	R	R	S	S	S	S	R	S	R	S	R	S
	106	MRSA 106	Breedin hens	22 WEEKS	2017	TIZI OUAZOU	TIZI OUAZOU	R	R	R	R	S	R	S	R	R	S	S	R	R	S	R	S
	107	MRSA 107	Breedin hens	21 WEEKS	2017	TIZI OUAZOU	TIZI OUAZOU	R	R	R	R	S	R	S	S	R	R	S	R	S	S	S	S
	108	MRSA 108	Breedin hens	10 WEEKS	2017	OUSSARA	DJELFA	R	R	R	R	S	R	S	R	S	S	S	S	R	S	R	S
	109	MRSA 109	Breedin hens	23 WEEKS	2017	OUASSARA	DJELFA	R	R	R	R	R	R	S	R	S	S	R	S	R	S	R	S
	110	MRSA 110	Breedin hens	4 WEEKS	2017	DJELFA	DJELFA	R	R	R	R	S	R	S	R	S	S	R	S	S	S	R	S
	111	MRSA 111	Breedin hens	20 WEEKS	2017	ZEMMOURI	BOUMERDES	R	R	R	R	S	R	S	R	S	R	S	S	R	S	R	S
	112	MRSA 112	Breedin hens	26 WEEKS	2017	BOUIRA	ALGER	R	R	R	R	R	S	S	S	R	S	R	S	R	S	S	S
	113	MRSA 113	Breedin hens	17 WEEKS	2017	ROUIBA	ROUIBA	R	R	R	R	S	R	S	R	R	S	S	R	R	S	R	S
	114	MRSA 114	Breedin hens	28 WEEKS	2017	ROUIBA	ROUIBA	R	R	R	R	S	R	S	R	R	S	S	S	R	S	R	S
	115	MRSA 115	Breedin hens	9WEEKS	2018	TIPAZA	TIPAZA	R	R	R	R	S	R	S	S	S	R	R	S	R	S	R	S
	116	MRSA 116	Breedin hens	11 WEEKS	2018	MSILA	MSILA	R	R	R	R	S	R	S	R	S	S	S	S	R	S	S	S
	117	MRSA 117	Breedin hens	31 WEEKS	2018	BOUIRA	BOUIRA	R	R	R	R	R	R	S	S	S	S	R	S	S	S	R	S
	118	MRSA 118	Breedin hens	10 WEEKS	2018	BOUIRA	BOUIRA	R	R	R	R	S	S	S	S	S	R	S	S	S	S	S	S
	119	MRSA 119	Breedin hens	33 WEEKS	2018	ROUIBA	ROUIBA	R	R	R	R	S	R	S	R	R	R	R	R	R	S	R	S
	120	MRSA 120	laying hens	23 WEEKS	2011	BOUMERDES	BOUMERDES	R	R	R	R	S	R	S	R	R	S	S	S	R	S	S	S
	121	MRSA 121	laying hens	26 WEEKS	2011	DJELFA	DJELFA	R	R	R	R	R	R	S	R	S	S	R	S	R	S	R	S
	122	MRSA 122	laying hens	18 WEEKS	2011	ROUIBA	ALGER	R	R	R	R	S	R	S	S	R	S	R	R	R	S	R	S
	123	MRSA 123	laying hens	20 WEEKS	2011	BBA	BBA	R	R	R	R	S	R	S	R	R	R	S	R	S	S	S	S
	124	MRSA 124	laying hens	16 WEEKS	2011	AIN BESSAM	BOUIRA	R	R	R	R	S	R	S	S	S	S	S	S	R	S	R	S
	125	MRSA 125	laying hens	13 WEEKS	2011	ANNABA	ANNABA	R	R	R	R	R	R	S	R	S	S	R	S	R	S	R	S
	126	MRSA 126	laying hens	32 WEEKS	2012	ORAN	ORAN	R	R	R	R	S	R	S	S	S	S	R	S	S	S	R	S
	127	MRSA 127	laying hens	36 WEEKS	2012	AIN DEFLA	AIN DEFLA	R	R	R	R	S	R	S	R	S	R	S	S	R	S	R	S
	128	MRSA 128	laying hens	32 WEEKS	2012	ROUIBA	ALGER	R	R	R	R	R	S	S	S	R	S	R	S	R	S	S	S
	129	MRSA 129	laying hens	23 WEEKS	2012	BATNA	BATNA	R	R	R	R	S	R	S	R	R	S	S	R	R	S	R	S
	130	MRSA 130	laying hens	26 WEEKS	2012	BEDJIA	BEDJIA	R	R	R	R	S	R	S	R	R	S	S	S	R	S	R	S
	131	MRSA 131	laying hens	51 WEEKS	2012	BLIDA	BLIDA	R	R	R	R	S	R	S	S	S	R	R	S	R	S	R	S
	132	MRSA 132	laying hens	19 WEEKS	2012	BOUIRA	BOUIRA	R	R	R	R	S	R	S	R	S	S	S	S	R	S	S	S
	133	MRSA 133	laying hens	10 WEEKS	2013	TIPAZA	TIPAZA	R	R	R	R	R	R	S	S	S	S	R	S	S	S	R	S
	134	MRSA 134	laying hens	77 DAYS	2013	DJELFA	DJELFA	R	R	R	R	R	R	S	S	S	S	R	S	S	S	S	S
	135	MRSA 135	laying hens	36 WEEKS	2013	SEDOUK	BEJAIA	R	R	R	R	S	R	S	R	S	S	S	R	R	S	R	S
	136	MRSA 136	laying hens	36 WEEKS	2013	BBA	BBA	R	R	R	R	R	R	S	R	S	S	R	S	R	S	S	S
	137	MRSA 137	laying hens	32 WEEKS	2013	ALGER	ALGER	R	R	R	R	S	R	S	S	S	S	S	S	R	S	R	S
	138	MRSA 138	laying hens	18 WEEKS	2013	ALGER	ALGER	R	R	R	R	S	S	S	R	S	S	R	S	R	S	S	S
	139	MRSA 139	laying hens	26 WEEKS	2014	BOUIRA	BOUIRA	R	R	R	R	S	R	S	S	S	S	S	S	S	S	R	S
	140	MRSA 140	laying hens	77 DAYS	2014	BBA	BBA	R	R	R	R	S	S	S	R	S	S	R	S	S	S	R	S
	141	MRSA 141	laying hens	20 WEEKS	2014	BATNA	BATNA	R	R	R	R	S	R	S	R	S	R	S	S	S	S	R	S
	142	MRSA 142	laying hens	27 WEEKS	2014	BATNA	BATNA	R	R	R	R	R	S	S	R	R	R	R	R	R	S	S	S
	143	MRSA 143	laying hens	20 WEEKS	2014	BATNA	BATNA	R	R	R	R	S	R	S	S	S	S	S	S	R	S	R	S
	144	MRSA 144	laying hens	20 WEEKS	2014	BATNA	BATNA	R	R	R	R	S	R	S	R	S	R	R	S	S	S	R	S
	145	MRSA 145	laying hens	21WEEKS	2014	BATNA	BATNA	R	R	R	R	S	S	S	S	S	S	S	S	R	S	S	S
	146	MRSA 146	laying hens	19 WEEKS	2014	ANNABA	ANNABA	R	R	R	R	S	R	S	R	R	R	R	R	R	S	R	S
	147	MRSA 147	laying hens	32 WEEKS	2015	SAIDA	SAIDA	R	R	R	R	S	R	S	S	S	S	S	S	S	S	R	S
	148	MRSA 148	laying hens	23 WEEKS	2015	TIARET	TIARET	R	R	R	R	S	R	S	S	S	S	S	S	R	S	R	S
	149	MRSA 149	laying hens	19WEEKS	2015	BBA	BBA	R	R	R	R	S	R	S	R	S	S	S	S	R	S	R	S
	150	MRSA 150	laying hens	32 WEEKS	2015	BBA	BBA	R	R	R	R	R	R	S	S	S	R	R	S	R	S	R	S
	151	MRSA 151	laying hens	22 WEEKS	2015	ROUIBA	ALGER	R	R	R	R	S	R	S	R	S	S	S	S	R	S	S	S
	152	MRSA 152	laying hens	26 WEEKS	2015	BOUMERDES	BOUMERDES	R	R	R	R	S	R	S	S	S	S	R	S	R	S	R	S
	153	MRSA 153	laying hens	13 WEEKS	2015	BOUDOUAOU	BOUMERDES	R	R	R	R	S	S	S	S	S	S	S	S	R	S	R	S
	154	MRSA 154	laying hens	26 WEEKS	2015	BOUMERDES	BOUMERDES	R	R	R	R	S	R	S	R	S	R	S	S	S	S	R	S
	155	MRSA 155	laying hens	77 DAYS	2016	DJELFA	DJELFA	R	R	R	R	R	R	S	R	R	R	R	S	R	S	R	S
	156	MRSA 156	laying hens	20 DAYS	2016	BOUMERDES	BOUMERDES	R	R	R	R	R	S	S	R	S	S	R	S	R	S	R	S
	157	MRSA 157	laying hens	26 WEEKS	2016	BOUIRA	BOUIRA	R	R	R	R	S	R	S	R	S	R	S	S	S	S	R	S
	158	MRSA 158	laying hens	27 WEEKS	2016	BATNA	BATNA	R	R	R	R	R	S	S	R	R	R	R	R	R	S	S	S
	159	MRSA 159	laying hens	20 WEEKS	2016	BATNA	BATNA	R	R	R	R	S	R	S	S	S	S	S	S	R	S	R	S
	160	MRSA 160	laying hens	19 WEEKS	2016	ANNABA	ANNABA	R	R	R	R	S	R	S	R	S	R	R	S	S	S	R	S
	161	MRSA 161	laying hens	28 WEEKS	2017	BOUMERDES	BOUMERDES	R	R	R	R	S	S	S	S	S	S	S	S	R	S	S	S
	162	MRSA 162	laying hens	24WEEKS	2017	TAOUERGUA	BOUMERDES	R	R	R	R	S	R	S	S	R	S	R	S	R	S	R	S
	163	MRSA 163	laying hens	52 DAYS	2017	ZEMMOURI	BOUMERDES	R	R	R	R	S	R	S	S	S	S	S	S	S	S	R	S
	164	MRSA 164	laying hens	24 WEEKS	2017	BBA	BBA	R	R	R	R	S	R	S	S	S	S	S	S	S	S	R	S
	165	MRSA 165	laying hens	19 WEEKS	2017	BBA	BBA	R	R	R	R	S	R	S	R	S	S	S	S	R	S	R	S
	166	MRSA 166	laying hens	10 WEEKS	2017	BOUIRA	ALGER	R	R	R	R	R	R	S	S	S	R	R	S	R	S	R	S
	167	MRSA 167	laying hens	20 WEEKS	2017	ROUIBA	ROUIBA	R	R	R	R	S	R	S	R	S	S	S	S	R	S	S	S
	168	MRSA 168	laying hens	18 WEEKS	2017	ROUIBA	ROUIBA	R	R	R	R	S	R	S	S	S	S	R	S	R	S	R	S
	169	MRSA 169	laying hens	19 WEEKS	2018	SAIDA	SAIDA	R	R	R	R	S	S	S	S	S	S	S	S	S	S	R	S
	170	MRSA 170	laying hens	10 WEEKS	2018	TIPAZA	TIPAZA	R	R	R	R	S	R	S	S	R	S	S	S	R	S	R	S
	171	MRSA 171	laying hens	23 WEEKS	2018	ANNABA	ANNABA	R	R	R	R	S	R	S	R	S	S	S	S	R	S	R	S
	172	MRSA 172	laying hens	26 WEEKS	2018	BOUIRA	BOUIRA	R	R	R	R	R	R	S	S	S	R	R	S	R	S	R	S
	173	MRSA 173	laying hens	26 WEEKS	2018	DJELFA	DJELFA	R	R	R	R	S	R	S	R	S	S	S	S	R	S	S	S
	174	MRSA 174	laying hens	77 DAYS	2018	DJELFA	DJELFA	R	R	R	R	S	R	S	S	S	S	R	S	R	S	R	S
	175	MRSA 175	laying hens	19 WEEKS	2018	ANNABA	ANNABA	R	R	R	R	S	R	S	S	S	S	S	S	R	S	S	S
	176	MRSA 176	laying hens	58 WEEKS	2018	BBA	BBA	R	R	R	R	S	S	S	R	S	R	S	S	S	S	R	S
	177	MRSA 177	broiler	50 DAYS	2011	BOUMERDES	BOUMERDES	R	R	R	R	R	R	S	S	S	R	R	S	R	S	R	S
	178	MRSA 178	broiler	30 WEEKS	2011	BOUMERDES	BOUMERDES	R	R	R	R	S	R	S	R	S	S	S	S	R	S	S	S
	179	MRSA 179	broiler	46 DAYS	2011	BOUMERDES	BOUMERDES	R	R	R	R	S	R	S	S	S	S	S	S	R	S	R	S
	180	MRSA 180	broiler	39 DAYS	2011	ALGER	ALGER	R	R	R	R	S	S	S	S	S	S	S	S	R	S	R	S
	181	MRSA 181	broiler	45 DAYS	2011	BBA	BBA	R	R	R	R	S	R	S	R	S	R	S	S	S	S	R	S
	182	MRSA 182	broiler	11 DAYS	2011	AIN BESSAM	BOUIRA	R	R	R	R	R	R	S	S	R	R	R	S	R	S	S	S
	183	MRSA 183	broiler	4 DAYS	2011	SAIDA	SAIDA	R	R	R	R	S	S	S	S	S	S	R	S	R	S	R	S
	184	MRSA 184	broiler	51 DAYS	2011	ANNABA	ANNABA	R	R	R	R	S	R	S	S	S	S	S	S	S	S	R	S
	185	MRSA 185	broiler	18 DAYS	2012	DELLYS	BOUMERDES	R	R	R	R	S	R	S	R	S	S	S	S	R	S	R	S
	186	MRSA 186	broiler	45 DAYS	2012	BOUMERDES	BOUMERDES	R	R	R	R	R	R	S	S	S	R	R	S	R	S	S	S
	187	MRSA 187	broiler	16 WEEKS	2012	BOUDOUAOU	BOUMERDES	R	R	R	R	S	R	S	R	S	S	S	S	R	S	S	S
	188	MRSA 188	broiler	39 DAYS	2012	ANNABA	ANNABA	R	R	R	R	S	R	S	S	S	S	S	S	R	S	R	S
	189	MRSA 189	broiler	56 DAYS	2012	BBA	BBA	R	R	R	R	R	S	S	R	R	R	R	R	R	S	S	S
	190	MRSA 190	broiler	18 WEEKS	2012	BLIDA	BLIDA	R	R	R	R	S	R	S	S	S	S	S	S	R	S	R	S
	191	MRSA 191	broiler	41 DAYS	2012	SETIF	SETIF	R	R	R	R	S	R	S	R	S	R	R	S	S	S	R	S
	192	MRSA 192	broiler	9 DAYS	2012	DJELFA	DJELFA	R	R	R	R	S	S	S	S	S	S	S	S	R	S	S	S
	193	MRSA 193	broiler	4 DAYS	2012	SAIDA	SAIDA	R	R	R	R	S	R	S	S	R	S	S	R	R	S	R	S
	194	MRSA 194	broiler	50 DAYS	2013	TIPAZA	TIPAZA	R	R	R	R	S	R	S	S	S	S	S	S	S	S	R	S
	195	MRSA 195	broiler	9 DAYS	2013	DJELFA	DJELFA	R	R	R	R	S	R	S	S	S	S	S	S	S	S	R	S
	196	MRSA 196	broiler	27 DAYS	2013	BOUMERDES	BOUMERDES	R	R	R	R	S	R	S	R	S	S	S	S	R	S	R	S
	197	MRSA 197	broiler	55 DAYS	2013	BOUMERDES	BOUMERDES	R	R	R	R	R	R	S	S	S	R	R	S	R	S	R	S
	198	MRSA 198	broiler	10 DAYS	2013	BATNA	BATNA	R	R	R	R	S	R	S	S	S	S	S	S	R	S	S	S
	199	MRSA 199	broiler	10 DAYS	2013	BATNA	BATNA	R	R	R	R	S	R	S	S	S	S	R	S	R	S	R	S
	200	MRSA 200	broiler	27 WEEKS	2013	BBA	BBA	R	R	R	R	S	R	S	S	S	S	S	S	R	S	R	S
	201	MRSA 201	broiler	45 DAYS	2013	ANNABA	ANNABA	R	R	R	R	S	R	S	R	S	R	S	S	S	S	R	S
	202	MRSA 202	broiler	55 DAYS	2013	ANNABA	ANNABA	R	R	R	R	S	R	S	S	S	S	S	R	R	S	R	S
	203	MRSA 203	broiler	55 DAYS	2013	ALGER	ALGER	R	R	R	R	R	R	S	R	S	S	R	S	S	S	S	S
	204	MRSA 204	broiler	55 DAYS	2013	ALGER	ALGER	R	R	R	R	S	R	S	S	S	S	S	S	S	S	R	S
	205	MRSA 205	broiler	45 DAYS	2013	AIN DEFLA	AIN DEFLA	R	R	R	R	S	S	S	R	S	S	S	S	S	S	S	S
	206	MRSA 206	broiler	45 DAYS	2013	AIN DEFLA	AIN DEFLA	R	R	R	R	S	R	S	S	S	S	S	S	S	S	R	S
	207	MRSA 207	broiler	55 DAYS	2014	BOUMERDES	BOUMERDES	R	R	R	R	S	R	S	R	R	S	S	S	R	S	S	S
	208	MRSA 208	broiler	12 DAYS	2014	BOUMERDES	BOUMERDES	R	R	R	R	R	R	S	R	S	S	R	S	R	S	R	S
	209	MRSA 209	broiler	28 DAYS	2014	BOUIRA	BOUIRA	R	R	R	R	S	R	S	S	S	S	S	R	R	S	R	S
	210	MRSA 210	broiler	58 DAYS	2014	BBA	BBA	R	R	R	R	S	R	S	R	R	R	S	R	S	S	S	S
	211	MRSA 211	broiler	58 DAYS	2014	BBA	BBA	R	R	R	R	S	R	S	S	S	S	S	S	R	S	R	S
	212	MRSA 212	broiler	58 DAYS	2014	BBA	BBA	R	R	R	R	R	R	S	R	S	S	S	S	R	S	R	S
	213	MRSA 213	broiler	10 DAYS	2014	BATNA	BATNA	R	R	R	R	S	R	S	S	S	S	R	S	S	S	R	S
	214	MRSA 214	broiler	44 DAYS	2014	ALGER	ALGER	R	R	R	R	S	R	S	R	S	R	S	S	R	S	R	S
	215	MRSA 215	broiler	44 DAYS	2014	ALGER	ALGER	R	R	R	R	R	S	S	S	R	S	R	S	R	S	S	S
	216	MRSA 216	broiler	40 DAYS	2014	ALGER	ALGER	R	R	R	R	S	R	S	S	R	S	S	R	R	S	R	S
	217	MRSA 217	broiler	40 DAYS	2014	ALGER	ALGER	R	R	R	R	S	R	S	R	R	S	S	S	R	S	S	S
	218	MRSA 218	broiler	40 DAYS	2014	ALGER	ALGER	R	R	R	R	S	R	S	S	S	R	R	S	R	S	R	S
	219	MRSA 219	broiler	36 DAYS	2015	TIZI OUAZOU	TIZI OUAZOU	R	R	R	R	S	R	S	R	S	S	S	S	R	S	S	S
	220	MRSA 220	broiler	26 DAYS	2015	TIZI OUAZOU	TIZI OUAZOU	R	R	R	R	R	R	S	S	S	S	R	S	S	S	R	S
	221	MRSA 221	broiler	10 DAYS	2015	TIZI OUAZOU	TIZI OUAZOU	R	R	R	R	S	S	S	S	S	R	S	S	S	S	S	S
	222	MRSA 222	broiler	44 DAYS	2015	SAIDA	SAIDA	R	R	R	R	S	R	S	R	R	R	R	R	R	S	R	S
	223	MRSA 223	broiler	58 DAYS	2015	SAIDA	SAIDA	R	R	R	R	S	R	S	S	R	S	S	S	R	S	S	S
	224	MRSA 224	broiler	10 DAYS	2015	TIARET	TIARET	R	R	R	R	R	R	S	R	S	S	R	S	R	S	R	S
	225	MRSA 225	broiler	10 DAYS	2015	TIARET	TIARET	R	R	R	R	S	R	S	S	R	S	S	S	R	S	R	S
	226	MRSA 226	broiler	29 DAYS	2015	BBA	BBA	R	R	R	R	S	R	S	R	R	R	S	R	S	S	S	S
	227	MRSA 227	broiler	58 DAYS	2015	BBA	BBA	R	R	R	R	S	R	S	S	S	S	S	S	R	S	R	S
	228	MRSA 228	broiler	44 DAYS	2015	BBA	BBA	R	R	R	R	R	R	S	R	S	S	R	S	R	S	R	S
	229	MRSA 229	broiler	55 DAYS	2015	ALGER	ALGER	R	R	R	R	S	R	S	S	S	S	R	S	S	S	R	S
	230	MRSA 230	broiler	12 DAYS	2015	ALGER	ALGER	R	R	R	R	S	R	S	R	S	R	S	S	R	S	R	S
	231	MRSA 231	broiler	40 DAYS	2015	ALGER	ALGER	R	R	R	R	R	S	S	S	R	S	R	S	R	S	S	S
	232	MRSA 232	broiler	41 DAYS	2015	ALGER	ALGER	R	R	R	R	S	R	S	S	R	S	S	R	R	S	S	S
	233	MRSA 233	broiler	44 DAYS	2015	BOUMERDES	BOUMERDES	R	R	R	R	S	R	S	R	R	S	S	S	R	S	S	S
	234	MRSA 234	broiler	50 DAYS	2015	DELLYS	BOUMERDES	R	R	R	R	S	R	S	S	S	R	R	S	R	S	S	S
	235	MRSA 235	broiler	44 DAYS	2016	SAIDA	SAIDA	R	R	R	R	S	R	S	R	S	S	S	S	R	S	S	S
	236	MRSA 236	broiler	44 DAYS	2016	BOUMERDES	BOUMERDES	R	R	R	R	R	R	S	S	S	S	R	S	S	S	R	S
	237	MRSA 237	broiler	28 DAYS	2016	BOUIRA	BOUIRA	R	R	R	R	R	R	S	S	S	S	R	S	S	S	R	S
	238	MRSA 238	broiler	58 DAYS	2016	BBA	BBA	R	R	R	R	S	S	S	R	S	S	S	R	R	S	R	S
	239	MRSA 239	broiler	58 DAYS	2016	BBA	BBA	R	R	R	R	R	R	S	R	S	S	R	S	R	S	S	S
	240	MRSA 240	broiler	10 DAYS	2016	BATNA	BATNA	R	R	R	R	S	R	S	S	S	S	S	S	R	S	R	S
	241	MRSA 241	broiler	29 DAYS	2016	ANNABA	ANNABA	R	R	R	R	S	S	S	R	S	S	R	S	R	S	S	S
	242	MRSA 242	broiler	55 DAYS	2016	ALGER	ALGER	R	R	R	R	S	R	S	S	S	S	S	S	S	S	S	S
	243	MRSA 243	broiler	12 DAYS	2016	ALGER	ALGER	R	R	R	R	S	S	S	R	S	S	R	S	S	S	S	S
	244	MRSA 244	broiler	40 DAYS	2016	ALGER	ALGER	R	R	R	R	S	R	S	R	S	R	S	S	S	S	S	S
	245	MRSA 245	broiler	40 DAYS	2016	ALGER	ALGER	R	R	R	R	R	S	S	R	R	R	R	R	R	S	S	S
	246	MRSA 246	broiler	40 DAYS	2016	ALGER	ALGER	R	R	R	R	S	R	S	S	S	S	S	S	R	S	S	S
	247	MRSA 247	broiler	56 DAYS	2017	TIZI OUAZOU	TIZI OUAZOU	R	R	R	R	S	R	S	R	S	R	R	S	S	S	S	S
	248	MRSA 248	broiler	27 DAYS	2017	OUSSARA	DJELFA	R	R	R	R	S	S	S	S	S	S	S	S	R	S	S	S
	249	MRSA 249	broiler	59 DAYS	2017	DJELFA	DJELFA	R	R	R	R	S	R	S	R	R	S	R	R	R	S	R	S
	250	MRSA 250	broiler	25 DAYS	2017	DJELFA	DJELFA	R	R	R	R	S	R	S	S	S	S	S	S	S	S	R	S
	251	MRSA 251	broiler	52 DAYS	2017	BOUMERDES	BOUMERDES	R	R	R	R	S	R	S	R	R	R	S	R	R	S	R	S
	252	MRSA 252	broiler	53 DAYS	2017	BBA	BBA	R	R	R	R	S	R	S	S	S	S	S	S	R	S	S	S
						Total number of resistan No.(%)		252 (100%)	252 (100%)	252 (100%)	252 (100%)	60 (23,80%)	208 (82,53 %)	0	126 ( 50%)	61 (24,20 %)	69 (27,38%)	104 (41,26%)	42 (16,66%)	178 ( 70,63%)	2 (0,79 %)	173 (68,65 %)	2 (0,79 %)
						Total number of sensitive No.(%)		0	0	0	0	192 (76,19 %)	44 (17,46 %)	252 (100%)	126 (50%)	191 (75,79 %)	183 (72,61 %)	148 (58,73%)	210 (82,33 %)	74 (29,36%)	250 (99,20%)	79 (31,34%)	250 (99,20%)
							Antibiotic	R	S
							PEN	252	0
							AMC	252	0
							OXA	252	0
							FOX	252	0
							GEN	60	192
							TCY	208	44
							VAN	0	252
							CEP	126	126
							STR	61	191
							SXT	69	183
							KAN	104	148
							CAM	42	210
							ERY	178	74
							MUP	2	250
							CLN	173	79
							RIF	2	250
